# Supplementary material for: Angiogenic profile identifies pulmonary hypertension in children with Down syndrome
Source: PubMed Central journal article supplement — Pulm Circ. 2019 Aug 14;9(3):2045894019866549. doi: 10.1177/2045894019866549 (PMC6696852; doi:10.1177/2045894019866549), 2019-08-14
Supplement: Supplemental_Material1.pdf [file Supplemental_Material1.pdf]

Supplemental Table 1: Semi-quantitative severity rating scale using WHO functional classification, echocardiographic findings and cardiac catheterization mean pulmonary arterial (PA) pressures when available. Severity scoring modified from McLaughlin et al. 2006 and Mourani et al. 2008.<sup>1,2</sup>

| Severity | WHO Functional Classification | Echocardiographic Findings                                                                                                       | Cardiac Catheterization Mean PA pressures |
|----------|-------------------------------|----------------------------------------------------------------------------------------------------------------------------------|-------------------------------------------|
| Mild     | I-II                          | None to mild RV hypertrophy<br>Septal flattening<br>Estimated PA pressures 1/3-2/3 systemic                                      | 1/3 to less than 2/3 systemic             |
| Moderate | III                           | Moderate RV hypertrophy<br>RV dilation<br>Septal flattening or mild septal bowing<br>Estimated PA pressures 2/3-systemic         | 2/3 to less than systemic                 |
| Severe   | IV                            | Moderate to severe RV hypertrophy<br>RV dilation<br>Moderate to severe septal bowing<br>Estimated PA pressures systemic or above | Systemic or above                         |

RV: right ventricular, PA: pulmonary artery
