# Supplementary material for: Angiogenic profile identifies pulmonary hypertension in children with Down syndrome
Source: PubMed Central journal article supplement — Pulm Circ. 2019 Aug 14;9(3):2045894019866549. doi: 10.1177/2045894019866549 (PMC6696852; doi:10.1177/2045894019866549), 2019-08-14
Supplement: Supplemental_Material2.pdf [file Supplemental_Material2.pdf]

Supplemental Table 2: Limits of detection for each analyte investigated from Human Angiogenesis High Performance Assay (R&D Systems, Minneapolis, MN)

| <b>Analyte</b> | <b>Pro or Anti-Angiogenic</b> | <b>Low standard of detection (pg/mL)</b> | <b>High standard of detection (pg/mL)</b> |
|----------------|-------------------------------|------------------------------------------|-------------------------------------------|
| Angiogenin     | Pro                           | 2.5                                      | 10200                                     |
| Angiopoietin-1 | Pro                           | 33                                       | 135,000                                   |
| Endostatin     | Anti                          | 88                                       | 90,000                                    |
| FGF acidic     | Pro                           | 5                                        | 20,600                                    |
| FGF basic      | Pro                           | 24                                       | 5,750                                     |
| PDGF-AA        | Pro                           | 1.8                                      | 7,400                                     |
| PDGF-BB        | Pro                           | 5.1                                      | 20,700                                    |
| PIGF           | Pro                           | 2.4                                      | 9,800                                     |
| Thrombospondin | Anti                          | 204                                      | 209,000                                   |
| VEGF           | Pro                           | 4                                        | 2850                                      |
| VEGF-D         | Pro                           | 18                                       | 75,000                                    |
